# Supplementary material
Source: MDPI journal article supplement (https://www.mdpi.com/2073-4441/14/4/559)
Supplement: s1 [file s1]

**Alum and gypsum amendments decrease phosphorus release from soil monoliths under  
simulated snowmelt flooding**

**Supplemental Material**

This section contains nine pages with eight tables

**Supplemental Table S1. Input parameters used for the Visual MINTEQ model for unamended, alum-amended and gypsum-amended Dencross 2 and Lakeland soils for 0, 14, 28, 42 and 56 days after flooding (DAF)**

| Parameter                              | Unamended |           |           |           |           | Alum- amended |           |           |           |           | Gypsum-amended |           |           |           |           |
|----------------------------------------|-----------|-----------|-----------|-----------|-----------|---------------|-----------|-----------|-----------|-----------|----------------|-----------|-----------|-----------|-----------|
|                                        | 0<br>DAF  | 14<br>DAF | 28<br>DAF | 42<br>DAF | 56<br>DAF | 0<br>DAF      | 14<br>DAF | 28<br>DAF | 42<br>DAF | 56<br>DAF | 0<br>DAF       | 14<br>DAF | 28<br>DAF | 42<br>DAF | 56<br>DAF |
| <b>Dencross 2 soil</b>                 |           |           |           |           |           |               |           |           |           |           |                |           |           |           |           |
| Eh (mV)                                | 397.3     | 257.1     | 211.6     | 194.9     | 103.5     | 358.2         | 181.0     | 123.8     | 35.6      | 33.7      | 389.1          | 270.1     | 246.9     | 226.6     | 187.0     |
| pH                                     | 8.0       | 8.1       | 7.6       | 7.6       | 7.4       | 5.5           | 7.5       | 7.1       | 7.3       | 7.3       | 7.5            | 7.7       | 7.4       | 7.4       | 7.2       |
| Ionic strength<br>(mol/L)              | 0.02      | 0.25      | 0.07      | 0.07      | 0.08      | 0.29          | 0.30      | 0.25      | 0.20      | 0.17      | 0.19           | 0.28      | 0.30      | 0.28      | 0.29      |
| Al (mg L <sup>-1</sup> )               | 0.03      | 0.23      | 0.50      | 0.09      | 0.05      | 0.61          | 0.88      | 1.28      | 0.43      | 0.08      | 0.03           | 0.22      | 0.50      | 0.14      | 0.09      |
| Ca (mg L <sup>-1</sup> )               | 32.3      | 56.7      | 112.8     | 85.7      | 73.6      | 570.1         | 565.7     | 440.5     | 290.6     | 237.7     | 586.9          | 589.2     | 567.3     | 519.5     | 460.9     |
| Cl (mg L <sup>-1</sup> )               | 5.5       | 5.7       | 7.3       | 5.4       | 4.3       | 7.8           | 9.5       | 10.9      | 5.9       | 5.6       | 9.7            | 8.7       | 11.7      | 7.2       | 6.6       |
| DOC (mg L <sup>-1</sup> ) <sup>a</sup> | 14.5      | 23.9      | 27.2      | 29.7      | 32.7      | 0.2           | 15.6      | 22.9      | 11.0      | 21.5      | 2.4            | 16.6      | 22.6      | 13.4      | 25.9      |
| F (mg L <sup>-1</sup> )                | 0.5       | 0.7       | 0.3       | 0.5       | 0.2       | 0.4           | 0.5       | 0.4       | 0.3       | 0.5       | 0.4            | 0.4       | 0.6       | 0.3       | 0.3       |
| Fe (mg L <sup>-1</sup> )               | 0.026     | 0.026     | 0.8       | 0.8       | 1.2       | 0.026         | 0.026     | 0.8       | 0.9       | 1.1       | 0.026          | 0.026     | 0.4       | 0.5       | 1.5       |
| Mg (mg L <sup>-1</sup> )               | 7.8       | 32.9      | 44.5      | 44.7      | 48.0      | 303.8         | 287.6     | 213.7     | 148.0     | 131.9     | 263.1          | 242.4     | 226.4     | 207.3     | 199.2     |
| Mn (mg L <sup>-1</sup> )               | 0.011     | 0.011     | 0.2       | 0.4       | 0.5       | 0.2           | 0.2       | 0.6       | 0.7       | 1.0       | 0.011          | 0.1       | 0.3       | 0.8       | 1.1       |
| NO <sub>3</sub> (mg L <sup>-1</sup> )  | 26.6      | 0.001     | 0.001     | 0.001     | 0.001     | 19.3          | 0.001     | 0.001     | 0.001     | 0.001     | 35.6           | 0.2       | 0.001     | 0.001     | 0.001     |
| P (mg L <sup>-1</sup> )                | 2.6       | 2.9       | 2.2       | 2.4       | 2.1       | 0.1           | 0.2       | 0.2       | 0.3       | 0.3       | 1.9            | 1.8       | 1.7       | 1.9       | 2.1       |
| SO <sub>4</sub> (mg L <sup>-1</sup> )  | 22.7      | 30.3      | 18.9      | 24.1      | 13.0      | 1798          | 2000      | 2379      | 1275      | 721       | 1177           | 1775      | 2321      | 1724      | 1418      |
| <b>Lakeland soil</b>                   |           |           |           |           |           |               |           |           |           |           |                |           |           |           |           |
| Eh (mV)                                | 335.6     | 304.7     | 225.4     | 208.0     | 199.2     | 454.0         | 252.7     | 259.0     | 242.0     | 231.2     | 409.4          | 280.8     | 256.5     | 244.1     | 236.2     |
| pH                                     | 8.2       | 8.2       | 8.0       | 8.1       | 7.9       | 7.8           | 8.0       | 8.0       | 7.8       | 7.8       | 8.0            | 8.1       | 7.8       | 7.8       | 7.9       |
| Ionic strength<br>(mol/L)              | 0.10      | 0.09      | 0.12      | 0.09      | 0.12      | 0.25          | 0.26      | 0.25      | 0.25      | 0.22      | 0.14           | 0.29      | 0.28      | 0.26      | 0.27      |
| Al (mg L <sup>-1</sup> )               | 0.04      | 0.28      | 0.38      | 0.46      | 0.29      | 0.90          | 1.34      | 2.29      | 1.06      | 0.93      | 0.05           | 0.36      | 0.69      | 0.28      | 0.18      |
| Ca (mg L <sup>-1</sup> )               | 134.1     | 143.2     | 182.8     | 134.5     | 151.0     | 476.5         | 536.1     | 461.1     | 416.7     | 298.6     | 781.3          | 702.6     | 615.9     | 563.1     | 652.9     |
| Cl (mg L <sup>-1</sup> )               | 4.7       | 5.4       | 7.4       | 12.7      | 9.1       | 6.2           | 4.6       | 4.2       | 2.9       | 2.8       | 3.4            | 2.9       | 1.4       | 1.0       | 1.0       |
| DOC (mg L <sup>-1</sup> ) <sup>a</sup> | 10.0      | 29.7      | 37.1      | 39.1      | 47.5      | 0.8           | 21.4      | 29.4      | 16.9      | 31.0      | 0.3            | 16.4      | 18.5      | 13.0      | 22.0      |
| F (mg L <sup>-1</sup> )                | 0.3       | 0.3       | 0.4       | 0.3       | 0.5       | 0.3           | 0.6       | 0.3       | 0.6       | 0.3       | 0.3            | 0.3       | 0.3       | 0.5       | 0.3       |
| Fe (mg L <sup>-1</sup> )               | 0.026     | 0.026     | 0.6       | 0.7       | 0.8       | 0.026         | 0.026     | 0.7       | 0.8       | 1.2       | 0.026          | 0.026     | 0.7       | 0.8       | 1.3       |
| Mg (mg L <sup>-1</sup> )               | 9.9       | 70.5      | 87.3      | 60.6      | 82.6      | 177.9         | 230.4     | 197.3     | 193.2     | 160.7     | 394.9          | 252.0     | 201.6     | 173.4     | 172.9     |
| Mn (mg L <sup>-1</sup> )               | 0.011     | 0.2       | 0.7       | 0.011     | 1.9       | 0.011         | 0.3       | 0.8       | 1.9       | 1.7       | 0.011          | 0.3       | 0.8       | 1.6       | 1.7       |
| NO <sub>3</sub> (mg L <sup>-1</sup> )  | 16.8      | 10.9      | 9.9       | 14.4      | 0.001     | 39.2          | 3.5       | 0.2       | 0.001     | 0.1       | 23.2           | 0.8       | 0.001     | 0.1       | 0.001     |
| P (mg L <sup>-1</sup> )                | 0.2       | 0.4       | 0.4       | 0.5       | 0.5       | 0.1           | 0.3       | 0.3       | 0.4       | 0.3       | 0.2            | 0.2       | 0.3       | 0.3       | 0.2       |
| SO <sub>4</sub> (mg L <sup>-1</sup> )  | 31.5      | 34.6      | 58.0      | 77.3      | 22.0      | 1368          | 1439      | 1883      | 1322      | 868       | 1672           | 2075      | 2230      | 1880      | 1442      |

<sup>a</sup> DOC- Dissolved organic carbon

**Supplemental Table S2. Initial soil properties<sup>a</sup> of the soils used in the experiment**

| Soil          | Sand<br>(g kg <sup>-1</sup> ) | Clay<br>(g kg <sup>-1</sup> ) | OM <sup>b</sup><br>(g kg <sup>-1</sup> ) | CCE <sup>c</sup><br>(g kg <sup>-1</sup> ) | pH  | M3- P <sup>d</sup><br>(mg kg <sup>-1</sup> ) | M3-cations <sup>e</sup> (mg kg <sup>-1</sup> ) |      |     |    |     |
|---------------|-------------------------------|-------------------------------|------------------------------------------|-------------------------------------------|-----|----------------------------------------------|------------------------------------------------|------|-----|----|-----|
|               |                               |                               |                                          |                                           |     |                                              | Ca                                             | Mg   | Fe  | Mn | Al  |
| Dencross 1    | 147                           | 481                           | 92.8                                     | 120.6                                     | 8.2 | 40.0                                         | 3872                                           | 1592 | 98  | 52 | 228 |
| Dencross 2    | 55                            | 694                           | 106.8                                    | 167.0                                     | 7.9 | 68.0                                         | 3730                                           | 1161 | 74  | 56 | 176 |
| Lakeland      | 168                           | 499                           | 86.6                                     | 106.6                                     | 8.3 | 13.9                                         | 2244                                           | 1370 | 146 | 21 | 22  |
| Osborne1      | 115                           | 640                           | 110.3                                    | 146.2                                     | 8.1 | 64.6                                         | 2481                                           | 2008 | 102 | 28 | 87  |
| Osborne2      | 76                            | 625                           | 94.1                                     | 116.8                                     | 8.0 | 72.0                                         | 1378                                           | 1173 | 147 | 38 | 421 |
| Osborne3      | 108                           | 647                           | 111.0                                    | 89.2                                      | 7.9 | 85.2                                         | 3236                                           | 1084 | 71  | 45 | 588 |
| Scanterbury 1 | 46                            | 750                           | 112.6                                    | 130.1                                     | 6.9 | 27.4                                         | 3155                                           | 1141 | 61  | 80 | 648 |
| Scanterbury 2 | 48                            | 768                           | 110.0                                    | 97.7                                      | 7.2 | 57.0                                         | 3511                                           | 956  | 68  | 71 | 236 |

<sup>a</sup>Mean of three replicates.

<sup>b</sup>Organic matter

<sup>c</sup>Calcium carbonate equivalent

<sup>d</sup>Mehlich 3-extractable phosphorus

<sup>e</sup>Mehlich 3- extractable cations

**Supplemental Table S3. Mean porewater dissolved reactive P concentration (mg L<sup>-1</sup>) with days after flooding in unamended, alum-amended and gypsum-amended soils (n=3). Standard error of mean is given in parentheses**

| Soil          | Treatment | Days after flooding (DAF) |              |              |              |              |              |              |              |              |
|---------------|-----------|---------------------------|--------------|--------------|--------------|--------------|--------------|--------------|--------------|--------------|
|               |           | 0                         | 7            | 14           | 21           | 28           | 35           | 42           | 49           | 56           |
| Dencross 1    | Control   | 0.84 (0.093)              | 0.86 (0.073) | 0.91 (0.032) | 0.93 (0.041) | 0.84 (0.039) | 0.98 (0.023) | 0.96 (0.049) | 0.93 (0.034) | 0.96 (0.051) |
|               | Alum      | 0.12 (0.030)              | 0.38 (0.019) | 0.45 (0.032) | 0.44 (0.059) | 0.57 (0.037) | 0.56 (0.045) | 0.56 (0.045) | 0.65 (0.042) | 0.72 (0.039) |
|               | Gypsum    | 0.39 (0.045)              | 0.59 (0.046) | 0.63 (0.031) | 0.64 (0.037) | 0.73 (0.040) | 0.85 (0.045) | 0.85 (0.038) | 1.15 (0.020) | 1.15 (0.084) |
| Dencross 2    | Control   | 2.62 (0.258)              | 3.06 (0.402) | 2.89 (0.225) | 1.99 (0.206) | 2.18 (0.135) | 2.17 (0.079) | 2.38 (0.138) | 2.54 (0.236) | 2.08 (0.180) |
|               | Alum      | 0.04 (0.009)              | 0.12 (0.009) | 0.24 (0.036) | 0.16 (0.011) | 0.22 (0.019) | 0.26 (0.017) | 0.26 (0.011) | 0.22 (0.005) | 0.27 (0.052) |
|               | Gypsum    | 1.91 (0.128)              | 2.21 (0.138) | 1.80 (0.080) | 1.44 (0.128) | 1.68 (0.076) | 1.92 (0.137) | 1.94 (0.138) | 2.10 (0.244) | 2.13 (0.194) |
| Lakeland      | Control   | 0.23 (0.047)              | 0.32 (0.023) | 0.40 (0.071) | 0.34 (0.023) | 0.40 (0.047) | 0.49 (0.095) | 0.50 (0.013) | 0.49 (0.040) | 0.49 (0.012) |
|               | Alum      | 0.13 (0.009)              | 0.20 (0.007) | 0.27 (0.030) | 0.22 (0.033) | 0.31 (0.032) | 0.36 (0.030) | 0.37 (0.030) | 0.30 (0.003) | 0.34 (0.008) |
|               | Gypsum    | 0.21 (0.033)              | 0.20 (0.044) | 0.25 (0.047) | 0.28 (0.020) | 0.32 (0.036) | 0.32 (0.037) | 0.34 (0.008) | 0.38 (0.042) | 0.18 (0.042) |
| Osborne 1     | Control   | 1.14 (0.317)              | 1.80 (0.347) | 1.76 (0.293) | 1.79 (0.311) | 1.77 (0.237) | 1.78 (0.211) | 1.79 (0.213) | 1.98 (0.273) | 1.57 (0.454) |
|               | Alum      | 0.06 (0.019)              | 0.54 (0.047) | 0.68 (0.051) | 0.56 (0.045) | 0.58 (0.186) | 0.79 (0.062) | 0.79 (0.065) | 0.85 (0.025) | 0.53 (0.070) |
|               | Gypsum    | 0.48 (0.016)              | 0.68 (0.030) | 0.72 (0.033) | 0.70 (0.032) | 0.74 (0.019) | 0.80 (0.052) | 0.81 (0.053) | 0.77 (0.063) | 1.05 (0.038) |
| Osborne 2     | Control   | 2.29 (0.183)              | 2.57 (0.192) | 2.61 (0.181) | 2.41 (0.110) | 2.64 (0.146) | 2.78 (0.092) | 2.80 (0.092) | 2.51 (0.089) | 2.15 (0.045) |
|               | Alum      | 0.92 (0.103)              | 1.37 (0.105) | 1.45 (0.049) | 1.45 (0.032) | 1.52 (0.082) | 1.72 (0.082) | 1.80 (0.132) | 1.70 (0.077) | 1.72 (0.078) |
|               | Gypsum    | 1.27 (0.116)              | 1.37 (0.023) | 1.37 (0.033) | 1.39 (0.064) | 1.15 (0.092) | 1.25 (0.164) | 1.09 (0.109) | 1.53 (0.100) | 1.79 (0.253) |
| Osborne 3     | Control   | 2.31 (0.164)              | 2.42 (0.020) | 2.50 (0.188) | 2.39 (0.120) | 2.60 (0.125) | 2.63 (0.104) | 2.66 (0.105) | 2.54 (0.161) | 2.19 (0.079) |
|               | Alum      | 0.43 (0.061)              | 1.44 (0.137) | 1.60 (0.044) | 1.56 (0.086) | 1.84 (0.093) | 1.92 (0.181) | 1.94 (0.183) | 1.84 (0.065) | 1.88 (0.132) |
|               | Gypsum    | 1.23 (0.115)              | 1.72 (0.097) | 1.61 (0.066) | 1.64 (0.077) | 1.85 (0.083) | 1.89 (0.059) | 1.91 (0.320) | 1.83 (0.088) | 1.69 (0.134) |
| Scanterbury 1 | Control   | 0.27 (0.028)              | 0.30 (0.045) | 0.34 (0.015) | 0.29 (0.058) | 0.33 (0.042) | 0.36 (0.050) | 0.37 (0.051) | 0.39 (0.055) | 0.89 (0.084) |
|               | Alum      | 0.03 (0.005)              | 0.02 (0.011) | 0.08 (0.019) | 0.28 (0.053) | 0.23 (0.057) | 0.16 (0.035) | 0.16 (0.035) | 0.45 (0.114) | 0.05 (0.024) |
|               | Gypsum    | 0.17 (0.021)              | 0.20 (0.026) | 0.24 (0.064) | 0.25 (0.075) | 0.25 (0.054) | 0.27 (0.049) | 0.27 (0.049) | 0.32 (0.110) | 0.30 (0.016) |
| Scanterbury 2 | Control   | 1.29 (0.068)              | 1.15 (0.111) | 1.15 (0.060) | 1.11 (0.094) | 1.23 (0.116) | 1.27 (0.163) | 1.28 (0.166) | 0.96 (0.180) | 1.34 (0.039) |
|               | Alum      | 0.21 (0.094)              | 0.43 (0.033) | 0.57 (0.129) | 0.35 (0.072) | 0.47 (0.066) | 0.62 (0.133) | 0.63 (0.134) | 0.63 (0.135) | 1.00 (0.325) |
|               | Gypsum    | 0.24 (0.013)              | 0.31 (0.085) | 0.40 (0.093) | 0.53 (0.120) | 0.47 (0.071) | 0.42 (0.111) | 0.42 (0.112) | 0.46 (0.116) | 0.40 (0.126) |

**Supplemental Table S4. Main effects ( $P < F$ ) of amended treatment, days after flooding (DAF), and their interactions on Eh, pore water dissolved reactive P (DRP) concentration and pore water pH (at 5-cm depth), and floodwater DRP concentration and floodwater pH**

| Soil                             | Parameter |                   |                  |                   |                  |
|----------------------------------|-----------|-------------------|------------------|-------------------|------------------|
|                                  | Eh        | Pore water<br>DRP | Pore water<br>pH | Floodwater<br>DRP | Floodwater<br>pH |
| <b>Amendment treatment</b>       |           |                   |                  |                   |                  |
| Dencross 1                       | 0.4386    | <0.0001           | 0.0229           | 0.0002            | 0.1102           |
| Dencross 2                       | 0.0583    | <0.0001           | 0.0659           | <0.0001           | 0.0009           |
| Lakeland                         | 0.3928    | <0.0001           | 0.1391           | 0.1683            | 0.8821           |
| Osborne 1                        | 0.2095    | 0.0080            | 0.0079           | 0.0004            | 0.1035           |
| Osborne 2                        | 0.0075    | 0.0001            | 0.0683           | 0.0047            | 0.3587           |
| Osborne 3                        | 0.0019    | 0.0004            | 0.0327           | 0.0054            | 0.3309           |
| Scanterbury 1                    | 0.0404    | 0.0005            | 0.0006           | 0.0255            | 0.0308           |
| Scanterbury 2                    | 0.0838    | 0.0002            | 0.0094           | <0.0001           | 0.0961           |
| <b>Days after flooding (DAF)</b> |           |                   |                  |                   |                  |
| Dencross 1                       | <0.0001   | <0.0001           | 0.0001           | <0.0001           | <0.0001          |
| Dencross 2                       | <0.0001   | 0.0268            | <0.0001          | <0.0001           | <0.0001          |
| Lakeland                         | <0.0001   | 0.0006            | 0.0011           | 0.0002            | 0.0003           |
| Osborne 1                        | <0.0001   | 0.0003            | <0.0001          | 0.0088            | <0.0001          |
| Osborne 2                        | <0.0001   | 0.0011            | <0.0001          | <0.0001           | 0.0001           |
| Osborne 3                        | <0.0001   | <0.0001           | <0.0001          | <0.0001           | <0.0001          |
| Scanterbury 1                    | <0.0001   | 0.0060            | 0.0002           | <0.0001           | 0.0008           |
| Scanterbury 2                    | <0.0001   | 0.0850            | <0.0001          | <0.0001           | 0.0005           |
| <b>Amendment treatment × DAF</b> |           |                   |                  |                   |                  |
| Dencross 1                       | <0.0001   | < 0.0001          | 0.1474           | <0.0001           | 0.0020           |
| Dencross 2                       | 0.2092    | 0.0038            | <0.0001          | <0.0001           | 0.0036           |
| Lakeland                         | 0.0186    | 0.0952            | 0.9032           | 0.0749            | 0.2038           |
| Osborne 1                        | <0.0001   | 0.0021            | 0.0029           | 0.0057            | 0.0199           |
| Osborne 2                        | <0.0001   | <0.0001           | 0.3098           | 0.0002            | 0.2870           |
| Osborne 3                        | <0.0001   | 0.0019            | <0.0001          | <0.0001           | 0.0220           |
| Scanterbury 1                    | 0.0333    | <0.0001           | 0.0155           | 0.0078            | 0.3763           |
| Scanterbury 2                    | 0.0036    | 0.1737            | <0.0001          | <0.0001           | 0.2589           |

**Supplemental Table S5. Mean floodwater dissolved reactive P concentration (mg L<sup>-1</sup>) with days after flooding in unamended, alum-amended and gypsum-amended soils (n=3). Standard error of mean is given in parentheses**

| Soil          | Treatment | Days after flooding (DAF) |              |              |              |              |              |              |              |              |
|---------------|-----------|---------------------------|--------------|--------------|--------------|--------------|--------------|--------------|--------------|--------------|
|               |           | 0                         | 7            | 14           | 21           | 28           | 35           | 42           | 49           | 56           |
| Dencross 1    | Control   | 0.08 (0.075)              | 0.11 (0.076) | 0.25 (0.132) | 0.32 (0.202) | 0.43 (0.318) | 0.52 (0.426) | 0.62 (0.460) | 0.71 (0.463) | 0.78 (0.488) |
|               | Alum      | 0.02 (0.015)              | 0.00 (0.000) | 0.06 (0.006) | 0.06 (0.025) | 0.08 (0.019) | 0.08 (0.015) | 0.06 (0.007) | 0.04 (0.012) | 0.02 (0.016) |
|               | Gypsum    | 0.02 (0.013)              | 0.01 (0.011) | 0.08 (0.021) | 0.10 (0.031) | 0.10 (0.024) | 0.11 (0.018) | 0.15 (0.017) | 0.19 (0.022) | 0.28 (0.117) |
| Dencross 2    | Control   | 0.06 (0.040)              | 0.09 (0.043) | 0.25 (0.022) | 0.32 (0.051) | 0.44 (0.085) | 0.49 (0.107) | 0.59 (0.134) | 0.75 (0.192) | 0.89 (0.156) |
|               | Alum      | 0.00 (0.003)              | 0.18 (0.176) | 0.11 (0.018) | 0.05 (0.003) | 0.07 (0.007) | 0.08 (0.010) | 0.08 (0.012) | 0.06 (0.018) | 0.04 (0.022) |
|               | Gypsum    | 0.04 (0.034)              | 0.07 (0.039) | 0.15 (0.008) | 0.24 (0.003) | 0.32 (0.050) | 0.36 (0.052) | 0.35 (0.034) | 0.31 (0.042) | 0.29 (0.033) |
| Lakeland      | Control   | 0.04 (0.043)              | 0.04 (0.035) | 0.13 (0.041) | 0.11 (0.045) | 0.10 (0.040) | 0.10 (0.040) | 0.09 (0.034) | 0.09 (0.030) | 0.04 (0.015) |
|               | Alum      | 0.02 (0.017)              | 0.02 (0.011) | 0.06 (0.013) | 0.03 (0.014) | 0.04 (0.005) | 0.05 (0.010) | 0.05 (0.009) | 0.05 (0.011) | 0.02 (0.012) |
|               | Gypsum    | 0.03 (0.014)              | 0.00 (0.000) | 0.06 (0.006) | 0.07 (0.012) | 0.07 (0.007) | 0.08 (0.003) | 0.08 (0.010) | 0.07 (0.021) | 0.01 (0.010) |
| Osborne 1     | Control   | 0.12 (0.093)              | 0.04 (0.036) | 0.14 (0.051) | 0.12 (0.058) | 0.16 (0.054) | 0.19 (0.056) | 0.36 (0.096) | 0.40 (0.096) | 0.33 (0.038) |
|               | Alum      | 0.20 (0.188)              | 0.01 (0.008) | 0.06 (0.005) | 0.05 (0.000) | 0.05 (0.012) | 0.06 (0.017) | 0.07 (0.026) | 0.08 (0.026) | 0.00 (0.005) |
|               | Gypsum    | 0.01 (0.003)              | 0.03 (0.026) | 0.08 (0.030) | 0.09 (0.015) | 0.09 (0.019) | 0.08 (0.025) | 0.11 (0.016) | 0.15 (0.053) | 0.02 (0.005) |
| Osborne 2     | Control   | 0.07 (0.043)              | 0.17 (0.076) | 0.31 (0.061) | 0.32 (0.052) | 0.37 (0.055) | 0.44 (0.051) | 0.45 (0.058) | 0.46 (0.084) | 0.47 (0.071) |
|               | Alum      | 0.00 (0.000)              | 0.00 (0.000) | 0.06 (0.003) | 0.07 (0.019) | 0.06 (0.010) | 0.05 (0.006) | 0.05 (0.004) | 0.04 (0.011) | 0.02 (0.022) |
|               | Gypsum    | 0.00 (0.003)              | 0.14 (0.047) | 0.16 (0.045) | 0.26 (0.052) | 0.27 (0.042) | 0.25 (0.052) | 0.29 (0.066) | 0.35 (0.068) | 0.34 (0.061) |
| Osborne 3     | Control   | 0.05 (0.046)              | 0.14 (0.016) | 0.21 (0.042) | 0.31 (0.035) | 0.34 (0.053) | 0.39 (0.085) | 0.66 (0.064) | 0.83 (0.163) | 0.98 (0.155) |
|               | Alum      | 0.00 (0.003)              | 0.00 (0.005) | 0.08 (0.019) | 0.18 (0.095) | 0.16 (0.052) | 0.11 (0.050) | 0.10 (0.052) | 0.08 (0.048) | 0.09 (0.076) |
|               | Gypsum    | 0.07 (0.052)              | 0.16 (0.081) | 0.23 (0.104) | 0.16 (0.075) | 0.26 (0.045) | 0.33 (0.073) | 0.34 (0.056) | 0.34 (0.061) | 0.34 (0.060) |
| Scanterbury 1 | Control   | 0.02 (0.022)              | 0.02 (0.019) | 0.08 (0.021) | 0.05 (0.015) | 0.09 (0.015) | 0.11 (0.016) | 0.14 (0.044) | 0.14 (0.058) | 0.05 (0.027) |
|               | Alum      | 0.00 (0.000)              | 0.00 (0.002) | 0.09 (0.003) | 0.05 (0.012) | 0.06 (0.004) | 0.06 (0.005) | 0.04 (0.010) | 0.02 (0.009) | 0.00 (0.000) |
|               | Gypsum    | 0.03 (0.026)              | 0.10 (0.104) | 0.11 (0.092) | 0.14 (0.079) | 0.11 (0.044) | 0.11 (0.026) | 0.08 (0.029) | 0.07 (0.026) | 0.00 (0.005) |
| Scanterbury 2 | Control   | 0.05 (0.029)              | 0.14 (0.003) | 0.24 (0.003) | 0.29 (0.020) | 0.32 (0.018) | 0.32 (0.029) | 0.32 (0.020) | 0.33 (0.035) | 0.30 (0.013) |
|               | Alum      | 0.02 (0.018)              | 0.01 (0.008) | 0.08 (0.016) | 0.05 (0.008) | 0.07 (0.015) | 0.08 (0.029) | 0.06 (0.011) | 0.05 (0.024) | 0.00 (0.002) |
|               | Gypsum    | 0.01 (0.012)              | 0.06 (0.022) | 0.07 (0.014) | 0.08 (0.023) | 0.09 (0.025) | 0.11 (0.035) | 0.06 (0.022) | 0.04 (0.021) | 0.02 (0.008) |

**Supplemental Table S6. Mean redox potential (Eh, mV) values with days after flooding in unamended, alum-amended and gypsum-amended soils (n=3). Standard error of mean is given in parentheses**

| Soil          | Treatment | Days after flooding (DAF) |            |            |            |            |            |            |            |            |
|---------------|-----------|---------------------------|------------|------------|------------|------------|------------|------------|------------|------------|
|               |           | 0                         | 7          | 14         | 21         | 28         | 35         | 42         | 49         | 56         |
| Dencross 1    | Control   | 419 (17.6)                | 284 (37.1) | 257 (18.3) | 238 (17.3) | 239 (19.2) | 213 (30.7) | 129 (23.5) | 73 (24.5)  | 60 (7.3)   |
|               | Alum      | 507 (43.2)                | 348 (33.9) | 301 (43.4) | 188 (27.3) | 160 (24.5) | 156 (13.7) | 157 (22.0) | 143 (27.0) | 149 (25.4) |
|               | Gypsum    | 413 (24.3)                | 283 (32.5) | 289 (34.9) | 228 (22.1) | 150 (22.1) | 147 (17.8) | 146 (21.6) | 145 (24.1) | 157 (35.8) |
| Dencross 2    | Control   | 397 (34.9)                | 287 (41.1) | 257 (54.3) | 238 (19.4) | 212 (45.2) | 197 (46.9) | 195 (47.5) | 185 (48.8) | 220 (45.5) |
|               | Alum      | 358 (69.1)                | 166 (30.1) | 181 (47.3) | 130 (14.3) | 124 (25.7) | 109 (33.8) | 36 (11.0)  | 60 (7.9)   | 104 (27.4) |
|               | Gypsum    | 389 (69.2)                | 291 (62.3) | 270 (53.2) | 284 (17.9) | 247 (42.0) | 242 (39.1) | 227 (30.2) | 214 (25.2) | 187 (25.1) |
| Lakeland      | Control   | 336 (51.4)                | 210 (40.2) | 305 (36.0) | 218 (40.5) | 225 (51.7) | 212 (45.8) | 198 (41.9) | 194 (39.1) | 199 (35.4) |
|               | Alum      | 454 (33.7)                | 274 (19.1) | 253 (18.8) | 275 (16.0) | 259 (15.7) | 245 (13.2) | 242 (19.9) | 236 (17.2) | 231 (18.8) |
|               | Gypsum    | 409 (37.8)                | 302 (33.5) | 281 (32.8) | 262 (28.4) | 257 (25.7) | 249 (23.4) | 244 (23.3) | 240 (22.2) | 236 (21.1) |
| Osborne 1     | Control   | 323 (23.2)                | 238 (47.9) | 245 (28.7) | 234 (25.6) | 217 (32.6) | 209 (24.8) | 200 (29.6) | 175 (29.6) | 199 (33.5) |
|               | Alum      | 437 (28.2)                | 290 (21.1) | 226 (20.1) | 250 (19.2) | 235 (13.7) | 223 (16.9) | 146 (9.6)  | 132 (9.6)  | 107 (7.6)  |
|               | Gypsum    | 402 (25.4)                | 266 (15.4) | 254 (15.4) | 240 (19.0) | 271 (12.3) | 228 (16.0) | 203 (18.3) | 211 (11.8) | 199 (15.3) |
| Osborne 2     | Control   | 419 (17.9)                | 255 (17.6) | 239 (21.9) | 233 (13.6) | 212 (26.0) | 227 (14.3) | 224 (14.6) | 218 (15.1) | 211 (16.9) |
|               | Alum      | 351 (14.2)                | 95 (12.4)  | 145 (20.7) | 132 (17.6) | 131 (15.4) | 116 (16.2) | 101 (12.6) | 124 (15.1) | 77 (10.0)  |
|               | Gypsum    | 390 (40.0)                | 269 (25.9) | 241 (24.2) | 239 (23.1) | 229 (19.0) | 225 (18.2) | 225 (19.5) | 219 (19.5) | 209 (20.3) |
| Osborne 3     | Control   | 370 (25.9)                | 259 (19.0) | 234 (17.1) | 221 (15.7) | 214 (14.1) | 199 (15.7) | 227 (12.7) | 182 (15.7) | 185 (12.5) |
|               | Alum      | 420 (31.9)                | 121 (8.8)  | 110 (10.8) | 114 (7.4)  | 81 (7.7)   | 45 (6.6)   | 37 (4.5)   | 24 (3.6)   | 23 (4.6)   |
|               | Gypsum    | 374 (40.6)                | 257 (18.6) | 194 (22.0) | 172 (26.0) | 140 (13.6) | 126 (17.6) | 121 (24.0) | 121 (21.9) | 114 (10.7) |
| Scanterbury 1 | Control   | 477 (58.8)                | 356 (36.6) | 331 (29.9) | 315 (30.6) | 293 (24.7) | 288 (22.7) | 238 (15.2) | 232 (17.5) | 234 (17.3) |
|               | Alum      | 506 (49.6)                | 341 (28.1) | 371 (23.9) | 250 (23.7) | 277 (34.6) | 288 (45.5) | 214 (18.0) | 331 (47.4) | 178 (13.7) |
|               | Gypsum    | 434 (86.1)                | 267 (44.4) | 254 (27.5) | 222 (34.3) | 177 (9.7)  | 153 (20.2) | 156 (35.7) | 143 (29.4) | 135 (31.0) |
| Scanterbury 2 | Control   | 351 (43.9)                | 243 (24.9) | 202 (41.0) | 245 (55.0) | 198 (35.8) | 149 (37.8) | 141 (36.4) | 125 (28.0) | 130 (27.1) |
|               | Alum      | 325 (44.1)                | 223 (33.7) | 172 (33.1) | 117 (19.5) | 67 (20.0)  | 65 (17.8)  | 62 (20.9)  | 55 (19.9)  | 157 (28.5) |
|               | Gypsum    | 404 (62.1)                | 91 (20.1)  | 210 (20.0) | 173 (17.6) | 156 (12.0) | 142 (13.5) | 128 (19.1) | 103 (17.6) | 91 (9.2)   |

**Supplemental Table S7. Mean pore water pH values with days after flooding in unamended, alum-amended and gypsum-amended soils (n=3). Standard error of mean is given in parentheses**

| Soil          | Treatment | Days after flooding (DAF) |            |            |            |            |            |            |            |            |
|---------------|-----------|---------------------------|------------|------------|------------|------------|------------|------------|------------|------------|
|               |           | 0                         | 7          | 14         | 21         | 28         | 35         | 42         | 49         | 56         |
| Dencross 1    | Control   | 7.6 (0.06)                | 8.5 (0.17) | 8.1 (0.05) | 8.1 (0.07) | 7.8 (0.12) | 7.8 (0.06) | 7.8 (0.12) | 8.1 (0.08) | 7.6 (0.01) |
|               | Alum      | 7.3 (0.17)                | 8.1 (0.25) | 7.8 (0.08) | 7.9 (0.20) | 7.5 (0.10) | 7.5 (0.10) | 7.5 (0.08) | 7.8 (0.13) | 7.4 (0.10) |
|               | Gypsum    | 7.6 (0.09)                | 8.3 (0.16) | 7.9 (0.04) | 7.9 (0.20) | 7.5 (0.11) | 7.6 (0.05) | 7.6 (0.14) | 7.8 (0.19) | 7.5 (0.04) |
| Dencross 2    | Control   | 8.0 (0.19)                | 8.2 (0.13) | 8.1 (0.14) | 7.9 (0.19) | 7.6 (0.20) | 7.6 (0.20) | 7.6 (0.20) | 8.0 (0.33) | 7.4 (0.17) |
|               | Alum      | 5.5 (0.51)                | 7.6 (0.28) | 7.5 (0.09) | 7.5 (0.21) | 7.1 (0.07) | 7.3 (0.07) | 7.3 (0.08) | 7.6 (0.19) | 7.3 (0.01) |
|               | Gypsum    | 7.5 (0.12)                | 7.8 (0.00) | 7.7 (0.07) | 7.7 (0.05) | 7.4 (0.03) | 7.5 (0.02) | 7.4 (0.02) | 7.7 (0.16) | 7.2 (0.03) |
| Lakeland      | Control   | 8.2 (0.24)                | 8.5 (0.10) | 8.2 (0.01) | 8.3 (0.18) | 8.0 (0.21) | 8.0 (0.18) | 7.9 (0.18) | 8.4 (0.26) | 7.9 (0.09) |
|               | Alum      | 7.8 (0.13)                | 8.1 (0.03) | 8.0 (0.08) | 8.1 (0.05) | 7.7 (0.01) | 7.8 (0.05) | 7.8 (0.01) | 8.1 (0.10) | 7.8 (0.03) |
|               | Gypsum    | 8.0 (0.23)                | 8.2 (0.05) | 8.1 (0.04) | 8.1 (0.13) | 7.8 (0.07) | 7.9 (0.07) | 7.8 (0.07) | 8.1 (0.05) | 7.9 (0.07) |
| Osborne 1     | Control   | 7.8 (0.04)                | 8.6 (0.17) | 8.2 (0.06) | 8.2 (0.15) | 7.8 (0.11) | 7.8 (0.07) | 7.8 (0.03) | 8.0 (0.12) | 7.7 (0.02) |
|               | Alum      | 6.3 (0.49)                | 8.1 (0.17) | 7.9 (0.16) | 7.7 (0.00) | 7.4 (0.09) | 7.5 (0.15) | 7.5 (0.09) | 7.8 (0.17) | 7.4 (0.14) |
|               | Gypsum    | 7.6 (0.02)                | 8.3 (0.12) | 8.1 (0.05) | 8.1 (0.15) | 7.7 (0.09) | 7.8 (0.06) | 7.8 (0.09) | 8.0 (0.01) | 7.7 (0.05) |
| Osborne 2     | Control   | 7.9 (0.03)                | 8.6 (0.11) | 8.3 (0.04) | 8.4 (0.07) | 7.9 (0.02) | 8.0 (0.07) | 7.9 (0.03) | 8.0 (0.05) | 7.8 (0.04) |
|               | Alum      | 7.6 (0.34)                | 8.2 (0.16) | 7.8 (0.08) | 7.9 (0.03) | 7.7 (0.14) | 7.6 (0.09) | 7.7 (0.08) | 7.9 (0.18) | 7.6 (0.13) |
|               | Gypsum    | 7.9 (0.13)                | 8.3 (0.11) | 8.0 (0.01) | 8.1 (0.08) | 7.8 (0.04) | 7.9 (0.02) | 7.8 (0.01) | 8.0 (0.15) | 7.7 (0.03) |
| Osborne 3     | Control   | 7.9 (0.22)                | 8.4 (0.17) | 8.1 (0.12) | 8.2 (0.16) | 7.8 (0.13) | 7.8 (0.08) | 7.8 (0.09) | 8.0 (0.11) | 7.7 (0.07) |
|               | Alum      | 5.9 (0.48)                | 8.0 (0.23) | 7.7 (0.04) | 7.8 (0.15) | 7.6 (0.15) | 7.5 (0.07) | 7.5 (0.06) | 7.7 (0.03) | 7.4 (0.08) |
|               | Gypsum    | 7.9 (0.19)                | 8.3 (0.08) | 8.0 (0.01) | 8.0 (0.07) | 7.6 (0.05) | 7.7 (0.04) | 7.7 (0.09) | 7.9 (0.12) | 7.6 (0.05) |
| Scanterbury 1 | Control   | 6.8 (0.19)                | 8.0 (0.27) | 7.4 (0.06) | 7.4 (0.07) | 7.2 (0.03) | 7.2 (0.04) | 7.2 (0.02) | 7.3 (0.04) | 7.0 (0.03) |
|               | Alum      | 4.5 (0.17)                | 6.5 (0.59) | 5.9 (0.30) | 6.0 (0.24) | 6.1 (0.25) | 6.1 (0.16) | 6.3 (0.17) | 6.8 (0.38) | 6.1 (0.13) |
|               | Gypsum    | 6.7 (0.17)                | 7.5 (0.44) | 7.0 (0.23) | 6.8 (0.08) | 6.7 (0.08) | 6.7 (0.08) | 6.7 (0.07) | 6.8 (0.10) | 6.6 (0.08) |
| Scanterbury 2 | Control   | 7.1 (0.12)                | 8.0 (0.22) | 7.6 (0.26) | 7.5 (0.13) | 7.2 (0.12) | 7.2 (0.07) | 7.2 (0.13) | 7.3 (0.34) | 7.1 (0.08) |
|               | Alum      | 4.8 (0.19)                | 7.5 (0.22) | 7.1 (0.16) | 7.0 (0.11) | 6.8 (0.02) | 6.9 (0.03) | 6.9 (0.04) | 7.2 (0.09) | 6.9 (0.02) |
|               | Gypsum    | 6.9 (0.14)                | 7.8 (0.29) | 7.2 (0.07) | 7.2 (0.12) | 7.0 (0.16) | 7.0 (0.06) | 7.0 (0.06) | 7.3 (0.03) | 6.9 (0.05) |

**Supplemental Table S8.** Saturation index<sup>†</sup> (SI = log IAP – log Ksp) of P-sorbing mineral species in equilibrium solution in unamended (control), alum-amended and gypsum amended soils at 0, 28 and 56 days after flooding (DAF) as predicted by Visual MINTEQ modeling

| Mineral                                                | SI at 0 DAF |              |                | SI at 28 DAF |              |                | SI at 56 DAF |              |                |
|--------------------------------------------------------|-------------|--------------|----------------|--------------|--------------|----------------|--------------|--------------|----------------|
|                                                        | Un-amended  | Alum-amended | Gypsum-amended | Un-amended   | Alum-amended | Gypsum-amended | Un-amended   | Alum-amended | Gypsum-amended |
| <b>Dencross 2 soil</b>                                 |             |              |                |              |              |                |              |              |                |
| Amorphous Al(OH) <sub>3</sub>                          | -3.8        | -2.5         | -1.1           | 0.5          | 1.3          | 0.4            | -1.6         | -0.1         | 0.1            |
| Al <sub>2</sub> O <sub>3</sub> (s)                     | -6.1        | -3.6         | -0.8           | 2.5          | 4.0          | 2.3            | -1.7         | 1.3          | 1.6            |
| Al <sub>4</sub> (OH) <sub>10</sub> SO <sub>4</sub> (s) | -8.6        | 3.0          | 4.6            | 9.1          | 15.1         | 11.1           | 1.0          | 8.8          | 10.0           |
| Boehmite                                               | -1.6        | -0.4         | 1.0            | 2.6          | 3.4          | 2.5            | 0.5          | 2.1          | 2.2            |
| Diaspore                                               | 0.3         | 1.5          | 2.9            | 4.5          | 5.3          | 4.4            | 2.4          | 3.9          | 4.1            |
| Fe(OH) <sub>2</sub> .7Cl <sub>3</sub> (s)              | -15.8       | 2.3          | -10.6          | -4.7         | -1.4         | -6.8           | -3.2         | 0.6          | 3.8            |
| Gibbsite (C)                                           | -0.63       | 0.6          | 2.0            | 3.6          | 4.4          | 3.5            | 1.6          | 3.1          | 3.2            |
| Goethite                                               | -16.6       | 0.8          | -11.2          | -5.6         | -2.5         | -7.8           | -4.1         | -0.4         | 2.8            |
| Hematite                                               | -30.9       | 3.9          | -20.2          | -8.9         | -2.7         | -13.3          | -6.0         | 1.5          | 7.9            |
| Hercynite                                              | -27.0       | -3.8         | -15.6          | -3.6         | 3.1          | -6.4           | -4.2         | 3.9          | 4.7            |
| Lepidocrocite                                          | -16.7       | 0.7          | -11.3          | -5.7         | -2.6         | -7.9           | -4.2         | -0.5         | 2.7            |
| Maghemite                                              | -37.0       | -2.2         | -26.3          | -15.0        | -8.7         | -19.4          | -12.1        | -4.6         | 1.8            |
| Magnetite                                              | -53.7       | 1.7          | -37.0          | -16.9        | -5.5         | -23.9          | -10.4        | 2.2          | 9.1            |
| <b>Lakeland soil</b>                                   |             |              |                |              |              |                |              |              |                |
| Amorphous Al(OH) <sub>3</sub>                          | -2.8        | 0.7          | -0.3           | -0.7         | 0.9          | 0.6            | -1.4         | 0.7          | 0.0            |
| Al <sub>2</sub> O <sub>3</sub> (s)                     | -4.2        | 2.9          | 1.0            | 0.1          | 3.2          | 2.6            | -1.4         | 3.0          | 1.4            |
| Al <sub>4</sub> (OH) <sub>10</sub> SO <sub>4</sub> (s) | -5.3        | 11.3         | 8.1            | 3.9          | 11.6         | 10.7           | 0.6          | 11.2         | 8.2            |
| Boehmite                                               | -0.7        | 2.9          | 1.9            | 1.5          | 3.0          | 2.7            | 0.7          | 2.9          | 2.1            |
| Diaspore                                               | 1.2         | 4.8          | 3.8            | 3.4          | 4.9          | 4.6            | 2.6          | 4.8          | 4.0            |
| Ferrihydrite                                           | -19.2       | -7.9         | 2.2            | -13.4        | -10.4        | -6.7           | -13.3        | -5.3         | 1.6            |
| Gibbsite (C)                                           | 0.3         | 3.9          | 2.9            | 2.5          | 4.0          | 3.7            | 1.7          | 3.9          | 3.1            |
| Hematite                                               | -29.7       | -7.1         | 13.3           | -18.1        | -12.1        | -4.6           | -17.8        | -1.8         | 12.1           |
| Hercynite                                              | -23.6       | -6.9         | 2.5            | -11.2        | -5.7         | -2.4           | -12.1        | -0.1         | 5.0            |
| Lepidocrocite                                          | -16.1       | -4.8         | 5.4            | -10.3        | -7.3         | -3.5           | -10.1        | -2.1         | 4.8            |
| Maghemite                                              | -35.8       | -13.2        | 7.2            | -24.2        | -18.1        | -10.7          | -23.9        | -7.9         | 6.0            |
| Magnesianferrihydrite                                  | -37.4       | -14.5        | 5.7            | -25.2        | -19.0        | -11.9          | -25.1        | -9.3         | 4.8            |
| Magnetite                                              | -51.0       | -18.8        | 12.8           | -31.3        | -22.9        | -11.6          | -30.3        | -6.8         | 13.8           |

<sup>†</sup>Positive SI values (in red text) indicate oversaturation. IAP ion activity product, KSP solubility product constant
